# Supplementary material for: A novel AgNPs-based colorimetric sensor for rapid detection of Cu2+ or Mn2+via pH control
Source: Royal Society of Chemistry journal article supplement (doi:10.1039/c5ra00001g), 2015-01-01
Supplement: c5ra00001g1.pdf [file c5ra00001g1.pdf]

## Supporting Information

### **A novel AgNPs-based colorimetric sensor for rapid detection of Cu<sup>2+</sup> or Mn<sup>2+</sup> via pH control**

**Genhua Wu,<sup>a</sup> Chen Dong,<sup>a,b</sup> Yonglong Li,<sup>b</sup> Zhuqing Wang,<sup>a,b</sup> Yuexia Gao,<sup>b</sup> Zheyu Shen<sup>\*,b</sup> and Aiguo Wu<sup>\*,b</sup>**

*<sup>a</sup> School of Chemistry and Chemical Engineering, Anqing Normal College, Anqing, Anhui 246001, China*

*<sup>b</sup>Key Laboratory of Magnetic Materials and Devices, Chinese Academy of Sciences, & Division of Functional Materials and Nano Devices, Ningbo Institute of Materials Technology & Engineering, Chinese Academy of Sciences, Ningbo, Zhejiang 315201, China*

**\*Corresponding Author**

Tel: 0086-574-86685039, or 0086-574-87617278; Fax: 0086-574-86685163

Email: [aiguo@nimte.ac.cn](mailto:aiguo@nimte.ac.cn) or [shenzheyu@nimte.ac.cn](mailto:shenzheyu@nimte.ac.cn)

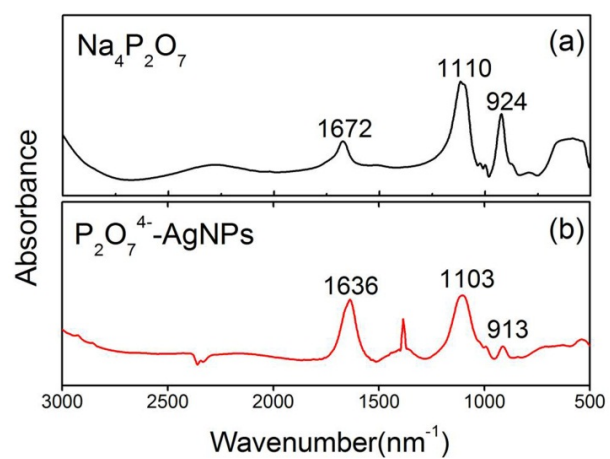

**Figure S1.** FT-IR spectra of  $\text{Na}_4\text{P}_2\text{O}_7$  (a) and  $\text{P}_2\text{O}_7^{4-}\text{-AgNPs}$  (b).

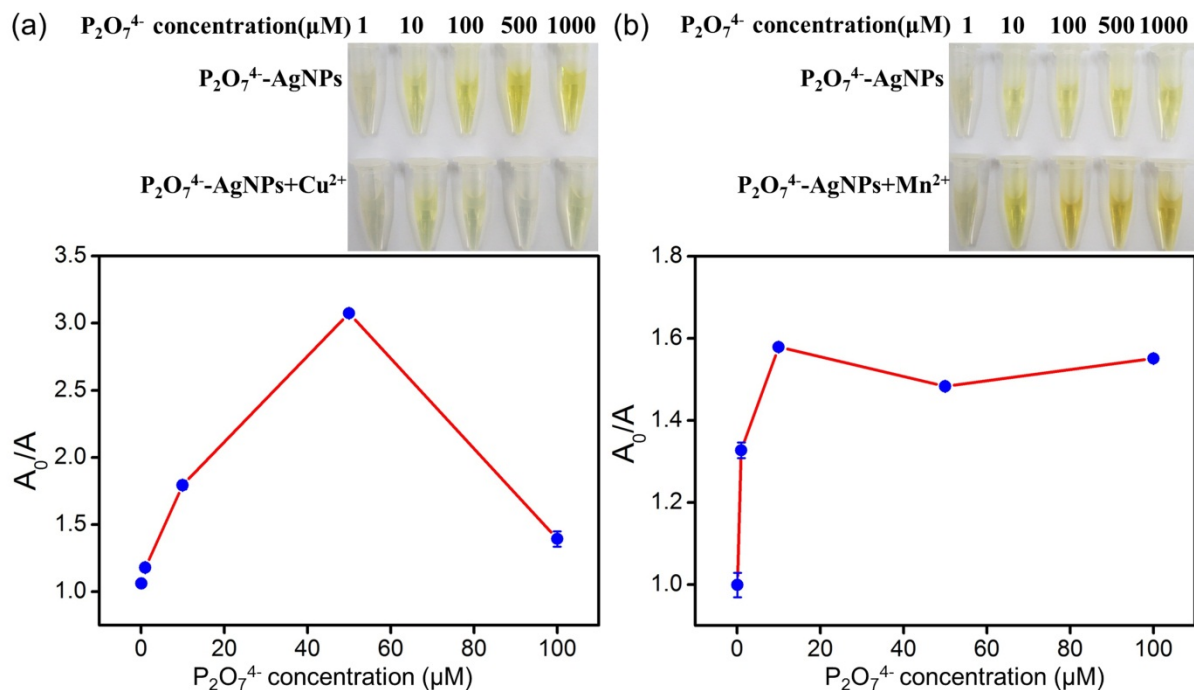

**Figure S2.** Influence of  $P_2O_7^{4-}$  concentration in the AgNPs-based detection systems on the sensing effect of  $Cu^{2+}$  or  $Mn^{2+}$ . (a): Photographic image and corresponding plot of  $A_0/A$  ( $A$  is the absorbance value at 414 nm in the UV-vis spectra of the detection systems incubated with 10  $\mu M$  of  $Cu^{2+}$ , and  $A_0$  is that of the detection systems without  $Cu^{2+}$ ) of the detection systems with different  $P_2O_7^{4-}$  concentrations at pH 1.9. (b) Photographic image and corresponding plot of  $A_0/A$  ( $A$  is the absorbance value at 395 nm in the UV-vis spectra of the detection systems incubated with 10  $\mu M$  of  $Mn^{2+}$ , and  $A_0$  is that of the detection systems without  $Mn^{2+}$ ) of the detection systems with different  $P_2O_7^{4-}$  concentrations at pH 12.0. The incubation time is 10 min. The HPMC concentration in the detection systems is 50 mg/L.

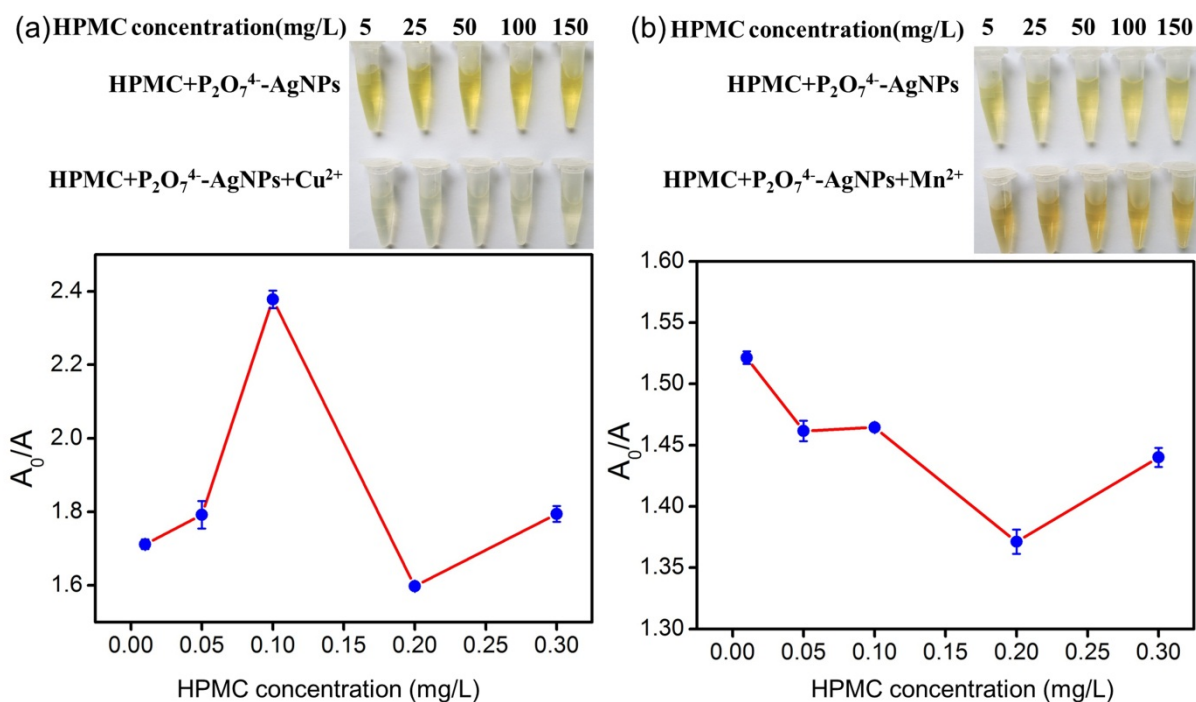

**Figure S3.** Influence of HPMC concentration in the AgNPs-based detection systems on the sensing effect of Cu<sup>2+</sup> or Mn<sup>2+</sup>. (a) Photographic image and corresponding plot of  $A_0/A$  ( $A$  is the absorbance value at 414 nm in the UV-vis spectra of the detection systems incubated with 10  $\mu$ M of Cu<sup>2+</sup>, and  $A_0$  is that of the detection systems without Cu<sup>2+</sup>) of the detection systems with different HPMC concentrations at pH 1.9. (b) Photographic image and corresponding plot of  $A_0/A$  ( $A$  is the absorbance value at 395 nm in the UV-vis spectra of the detection systems incubated with 10  $\mu$ M of Mn<sup>2+</sup>, and  $A_0$  is that of the detection systems without Mn<sup>2+</sup>) of the detection systems with different HPMC concentrations at pH 12.0. The incubation time is 10 min. The P<sub>2</sub>O<sub>7</sub><sup>4-</sup> concentration in the detection systems is 500  $\mu$ M.

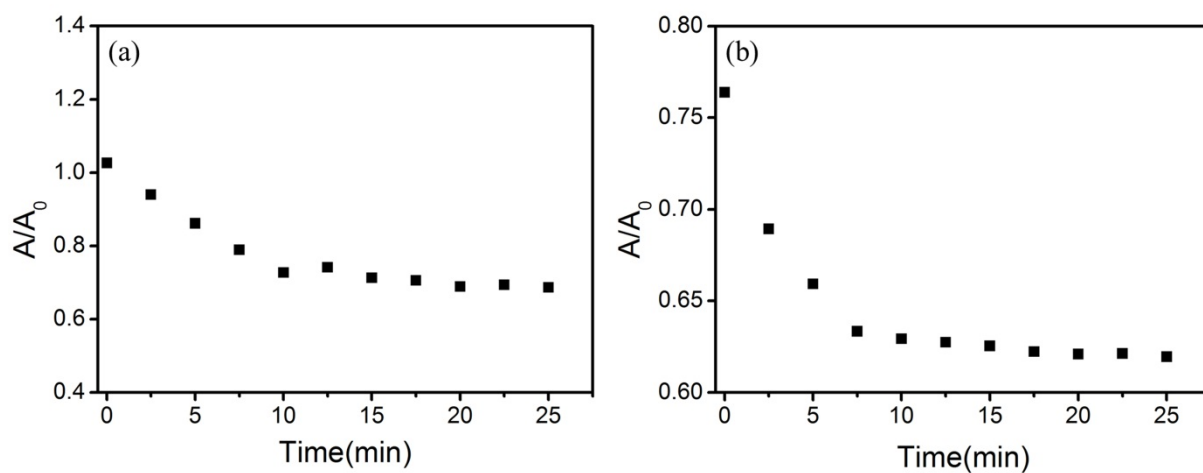

**Figure S4.** Influence of the incubation time between the detection system and  $\text{Cu}^{2+}$  ( $0.2 \mu\text{M}$ ) at pH 1.9 (a) or between the detection system and  $\text{Mn}^{2+}$  ( $5.0 \mu\text{M}$ ) at pH 12.0 (b) on the  $A/A_0$  values.  $A$  is the absorbance value at 414 nm or 395 nm in the UV-vis spectra of the detection systems incubated with  $0.2 \mu\text{M}$  of  $\text{Cu}^{2+}$  or  $5 \mu\text{M}$  of  $\text{Mn}^{2+}$ , and  $A_0$  is that of the detection systems without  $\text{Cu}^{2+}$  or  $\text{Mn}^{2+}$ . The  $\text{P}_2\text{O}_7^{4-}$  concentration in the detection systems is  $500 \mu\text{M}$ . The HPMC concentration in the detection systems is  $50 \text{ mg/L}$ .

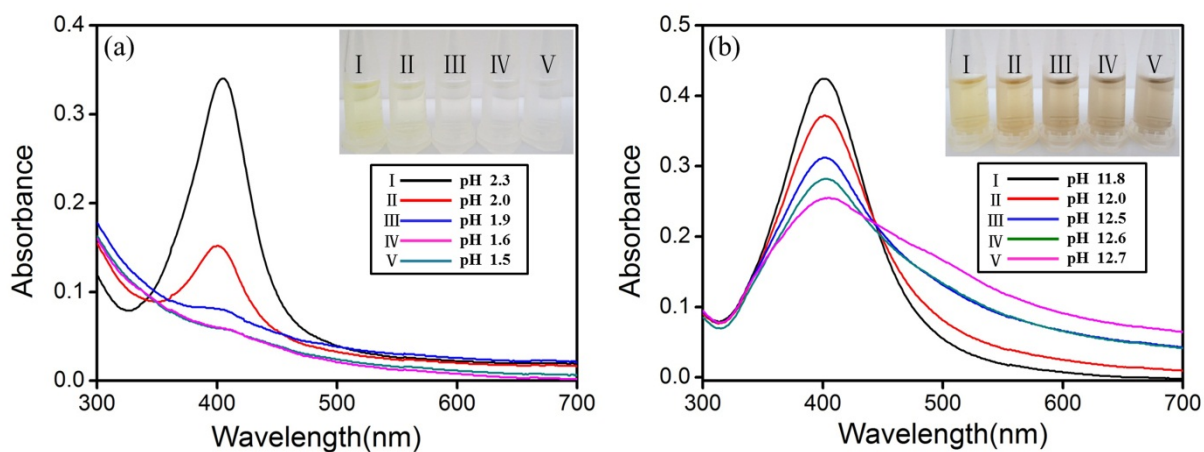

**Figure S5.** Influence of pH values on the UV-vis absorption of the detection systems containing  $0.5 \mu\text{M}$  of  $\text{Cu}^{2+}$  (a) and  $5.0 \mu\text{M}$  of  $\text{Mn}^{2+}$  (b). The inset shows the photographic image of the corresponding solutions. The  $\text{P}_2\text{O}_7^{4-}$  concentration in the detection systems is  $500 \mu\text{M}$ . The HPMC concentration in the detection systems is  $50 \text{ mg/L}$ . The incubation time is  $10 \text{ min}$ .

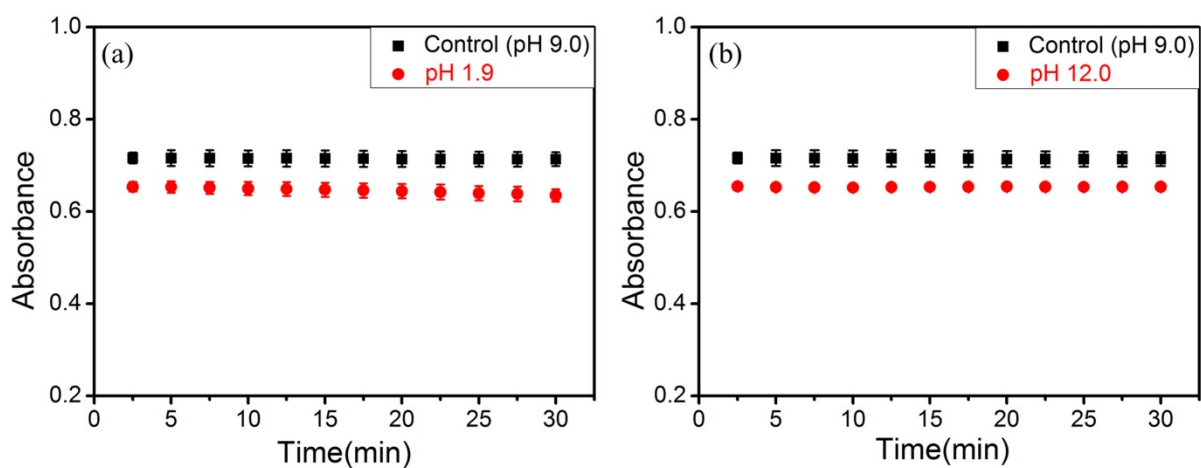

**Figure S6.** Change in UV-vis absorption of AgNPs dispersions without  $\text{Cu}^{2+}$  at pH 1.9 (a) and without  $\text{Mn}^{2+}$  at pH 12.0 (b) compared with the control (pH 9.0) during storage at room temperature within 30 min. The  $\text{P}_2\text{O}_7^{4-}$  concentration in the detection systems is 500  $\mu\text{M}$ . The HPMC concentration in the detection systems is 50 mg/L. The incubation time is 10 min.

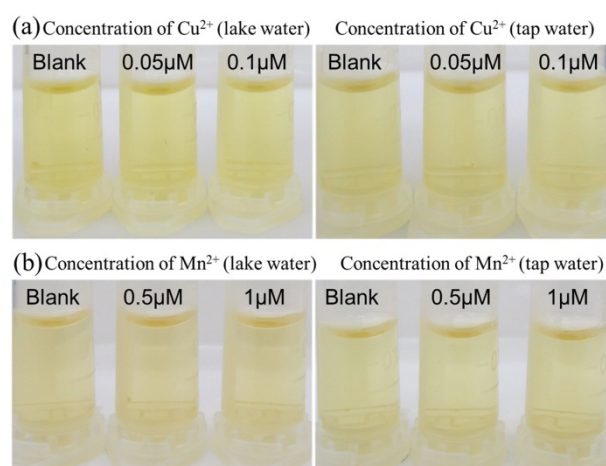

**Figure S7.** Detection of  $\text{Cu}^{2+}$  (a) or  $\text{Mn}^{2+}$  (b) in real water samples by our developed colorimetric method.

**Table S1.** Influence of potential interfering ions on the detection of Cu<sup>2+</sup> or Mn<sup>2+</sup>

| Potential interfering ions of Cu <sup>2+</sup><br>detection                                                                                                                                              | Tolerance ratios (compared to $5 \times 10^{-8}$<br>M) <sup>a</sup> |
|----------------------------------------------------------------------------------------------------------------------------------------------------------------------------------------------------------|---------------------------------------------------------------------|
| Ni <sup>2+</sup> , Zn <sup>2+</sup> , Na <sup>+</sup> , K <sup>+</sup> , PO <sub>4</sub> <sup>3-</sup> , SO <sub>4</sub> <sup>2-</sup> , NO <sub>3</sub> <sup>-</sup> ,<br>CO <sub>3</sub> <sup>2-</sup> | 100000                                                              |
| Ba <sup>2+</sup> , Cd <sup>2+</sup> , Al <sup>3+</sup> , Fe <sup>3+</sup> , Mg <sup>2+</sup> , Ca <sup>2+</sup> , Fe <sup>2+</sup> ,<br>Mn <sup>2+</sup> , Co <sup>2+</sup>                              | 10000                                                               |
| Hg <sup>2+</sup> , Pb <sup>2+</sup> , Cr <sup>3+</sup>                                                                                                                                                   | 1000                                                                |
| Cr(VI)                                                                                                                                                                                                   | 100                                                                 |
| Potential interfering ions of Mn <sup>2+</sup><br>detection                                                                                                                                              | Tolerance ratios (compared to $5 \times 10^{-7}$<br>M) <sup>b</sup> |
| Mg <sup>2+</sup> , Na <sup>+</sup> , K <sup>+</sup> , Ca <sup>2+</sup> , PO <sub>4</sub> <sup>3-</sup> , SO <sub>4</sub> <sup>2-</sup> , NO <sub>3</sub> <sup>-</sup> ,<br>CO <sub>3</sub> <sup>2-</sup> | 1000                                                                |
| Co <sup>2+</sup> , Cr <sup>3+</sup>                                                                                                                                                                      | 500                                                                 |
| Al <sup>3+</sup> , Fe <sup>3+</sup> , Cr(VI)                                                                                                                                                             | 200                                                                 |
| Cu <sup>2+</sup>                                                                                                                                                                                         | 150                                                                 |
| Cd <sup>2+</sup> , Hg <sup>2+</sup> , Ni <sup>2+</sup> , Zn <sup>2+</sup>                                                                                                                                | 100                                                                 |
| Ba <sup>2+</sup> , Pb <sup>2+</sup>                                                                                                                                                                      | 50                                                                  |
| Fe <sup>2+</sup>                                                                                                                                                                                         | 20                                                                  |

<sup>a</sup>The limit of detection of Cu<sup>2+</sup> is  $5 \times 10^{-8}$  M by the naked eyes;

<sup>b</sup>The limit of detection of Mn<sup>2+</sup> is  $5 \times 10^{-7}$  M by the naked eyes.

**Table S2.** Comparison of Cu<sup>2+</sup> or Mn<sup>2+</sup> detection using AuNPs or AgNPs-based systems.

| Method      | Probe                                                | Target           | LOD     | Selectivity | Ref.      |
|-------------|------------------------------------------------------|------------------|---------|-------------|-----------|
| Colorimetry | Starch-AgNPs                                         | Cu <sup>2+</sup> | 0.632μM | Good        | 16        |
| Colorimetry | Dopamine-AgNPs                                       | Cu <sup>2+</sup> | 0.05μM  | Good        | 6         |
| Colorimetry | P <sub>2</sub> O <sub>7</sub> <sup>4-</sup> -AgNPs   | Cu <sup>2+</sup> | 2nM     | Good        | This work |
| Colorimetry | P <sub>3</sub> O <sub>10</sub> <sup>5-</sup> - AgNPs | Mn <sup>2+</sup> | 0.05μM  | Good        | 13        |
| Colorimetry | L-tyrosine-AgNPs                                     | Mn <sup>2+</sup> | 16 nM   | Not good    | 18        |
| Colorimetry | P <sub>2</sub> O <sub>7</sub> <sup>4-</sup> -AgNPs   | Mn <sup>2+</sup> | 20nM    | Good        | This work |
